# Supplementary material for: First use of artificial canopy bridge by the world’s most critically endangered primate the Hainan gibbon Nomascus hainanus
Source: PubMed Central journal article supplement (PMC7567071; doi:10.1038/s41598-020-72641-z), 2020-10-15
Supplement: 41598_2020_72641_MOESM1_ESM.pdf [file 41598_2020_72641_MOESM1_ESM.pdf]

**First use of artificial canopy bridge by the world's most critically endangered primate the Hainan gibbon *Nomascus hainanus***

**Authors:** Bosco Pui Lok CHAN, Yik Fui Philip LO, Xiao-Jiang HONG, Chi Fung MAK, Ziyu MA

**Supplementary Table S1 online** Date, travel direction and age–sex crossing sequence of all crossing events by the Hainan gibbon group during the study period in 2015-2019.

| Crossing event | Year | Month | Day | Travel direction | Age–sex crossing sequence                    |
|----------------|------|-------|-----|------------------|----------------------------------------------|
| 1              | 2016 | 5     | 2   | Uncertain        | Uncertain                                    |
| 2              | 2016 | 7     | 30  | Leaving          | Uncertain                                    |
| 3              | 2016 | 8     | 17  | Uncertain        | Uncertain                                    |
| 4              | 2016 | 10    | 5   | Uncertain        | Uncertain                                    |
| 5              | 2018 | 8     | 25  | Coming           | large juvenile > female                      |
| 6              | 2018 | 8     | 31  | Leaving          | female > small juvenile > large juvenile     |
| 7              | 2018 | 9     | 3   | Coming           | small juvenile > female                      |
| 8              | 2018 | 9     | 8   | Leaving          | small juvenile 1 > female                    |
| 9              | 2018 | 9     | 12  | Leaving          | small juvenile > small juvenile > female     |
| 10             | 2018 | 9     | 13  | Coming           | female > small juvenile                      |
| 11             | 2018 | 9     | 13  | Coming           | female > small juvenile 1 > small juvenile 2 |
| 12             | 2018 | 9     | 13  | Leaving          | female > small juvenile 1 > small juvenile 2 |
| 13             | 2018 | 9     | 20  | Leaving          | female > small juvenile                      |
| 14             | 2018 | 9     | 20  | Coming           | female                                       |
| 15             | 2018 | 9     | 22  | Leaving          | small juvenile > small juvenile > female     |
| 16             | 2018 | 9     | 25  | Coming           | small juvenile > female                      |
| 17             | 2018 | 10    | 5   | Leaving          | female > small juvenile                      |
| 18             | 2018 | 10    | 7   | Leaving          | small juvenile > female                      |
| 19             | 2018 | 10    | 11  | Leaving          | female > small juvenile                      |
| 20             | 2018 | 10    | 14  | Leaving          | small juvenile > female > small juvenile     |
| 21             | 2018 | 10    | 20  | Coming           | small juvenile > female                      |
| 22             | 2018 | 10    | 25  | Coming           | small juvenile > female                      |
| 23             | 2018 | 10    | 28  | Coming           | female                                       |
| 24             | 2018 | 10    | 31  | Leaving          | small juvenile > female                      |
| 25             | 2018 | 11    | 2   | Coming           | female                                       |
| 26             | 2018 | 11    | 4   | Leaving          | female > small juvenile                      |
| 27             | 2018 | 11    | 7   | Leaving          | female > small juvenile 1 > small juvenile 2 |
| 28             | 2018 | 11    | 11  | Coming           | small juvenile 1 > small juvenile 2 > female |
| 29             | 2018 | 11    | 14  | Coming           | small juvenile 1 > female > small juvenile 2 |
| 30             | 2018 | 11    | 22  | Leaving          | small juvenile 1 > small juvenile 2 > female |

|           |      |    |    |         |                                              |
|-----------|------|----|----|---------|----------------------------------------------|
| <b>31</b> | 2018 | 11 | 27 | Leaving | female > small juvenile                      |
| <b>32</b> | 2019 | 1  | 8  | Leaving | female                                       |
| <b>33</b> | 2019 | 1  | 8  | Leaving | small juvenile                               |
| <b>34</b> | 2019 | 1  | 10 | Coming  | female > small juvenile 1 > small juvenile 2 |
| <b>35</b> | 2019 | 1  | 14 | Leaving | small juvenile 1 > female > small juvenile 2 |
| <b>36</b> | 2019 | 1  | 14 | Coming  | small juvenile 1 > female > small juvenile 2 |
| <b>37</b> | 2019 | 1  | 15 | Leaving | small juvenile > female                      |
| <b>38</b> | 2019 | 1  | 16 | Coming  | small juvenile 1 > small juvenile 2 > female |
| <b>39</b> | 2019 | 1  | 18 | Leaving | female                                       |
| <b>40</b> | 2019 | 1  | 21 | Leaving | small juvenile > female                      |
| <b>41</b> | 2019 | 1  | 21 | Coming  | female                                       |
| <b>42</b> | 2019 | 1  | 25 | Coming  | female > small juvenile 1 > small juvenile 2 |
| <b>43</b> | 2019 | 1  | 27 | Leaving | female > small juvenile 1 > small juvenile 2 |
| <b>44</b> | 2019 | 1  | 30 | Leaving | small juvenile 1 > female > small juvenile 2 |
| <b>45</b> | 2019 | 1  | 30 | Leaving | female                                       |
| <b>46</b> | 2019 | 2  | 3  | Leaving | female > small juvenile                      |
| <b>47</b> | 2019 | 2  | 7  | Coming  | small juvenile                               |
| <b>48</b> | 2019 | 2  | 8  | Coming  | female                                       |
| <b>49</b> | 2019 | 2  | 12 | Leaving | female > small juvenile 1 > small juvenile 2 |
| <b>50</b> | 2019 | 2  | 14 | Leaving | female > small juvenile                      |
| <b>51</b> | 2019 | 2  | 19 | Coming  | small juvenile 1 > female > small juvenile 2 |
| <b>52</b> | 2019 | 2  | 25 | Coming  | small juvenile 1 > small juvenile 2          |
